# Supplementary material for: Exfoliation and restacking route to Keggin-Al13-treated layered ruthenium oxide for enhanced lithium ion storage performance
Source: Royal Society of Chemistry journal article supplement (doi:10.1039/d3nj05138b), 2023-12-22
Supplement: d3nj05138b1.pdf [file d3nj05138b1.pdf]

# Exfoliation and Restacking Route to Keggin- $\text{Al}_{13}$ - Treated Layered Ruthenium Oxide for Enhanced Lithium Ion Storage Performance

*Minseop Lee<sup>a</sup>, Ji-Ho Park<sup>a</sup>, Seung-Min Paek<sup>\*,b</sup>*

<sup>a</sup>Department of Chemistry, Kyungpook National University, Daegu 41566, Republic of  
Korea. E-mail: [smpaek@knu.ac.kr](mailto:smpaek@knu.ac.kr) (S.-M. P.)

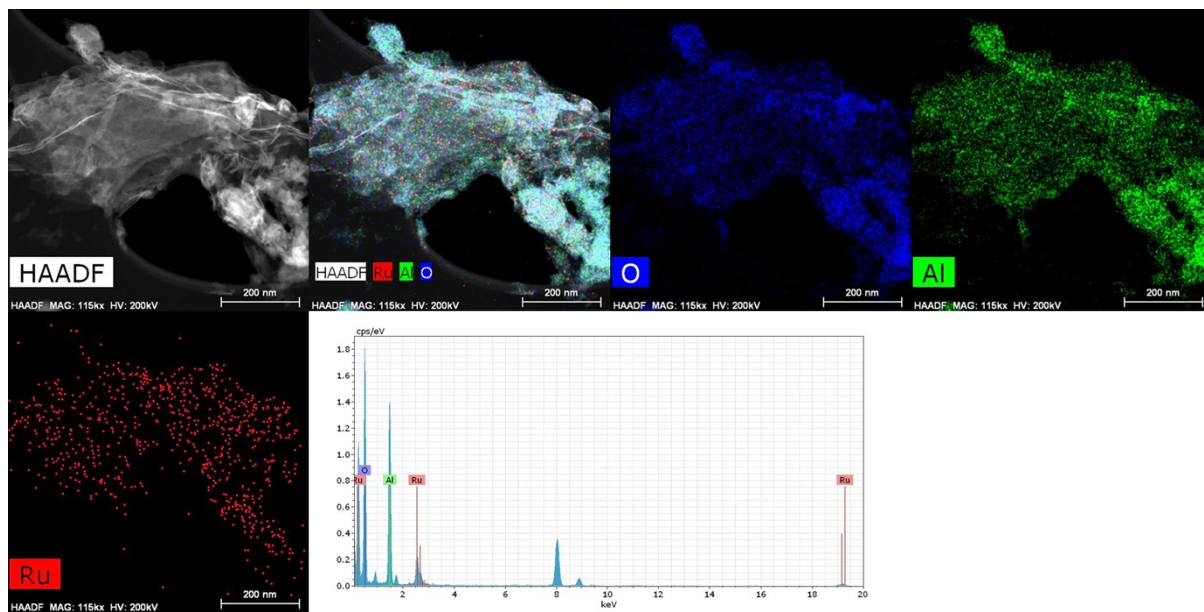

**Fig. S1** HAADF-STEM images of AR-60; Elemental mapping image and EDS spectrum of AR-60.

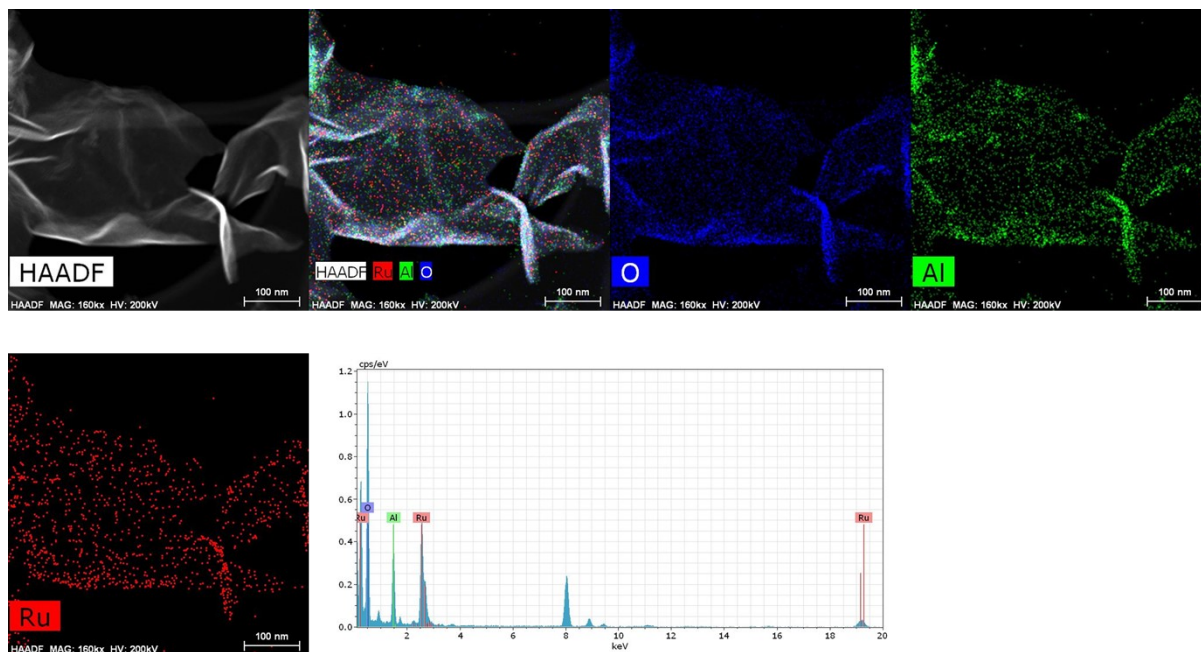

**Fig. S2** HAADF-STEM images of AR-150 ; Elemental mapping image and EDS spectrum of AR-150 .

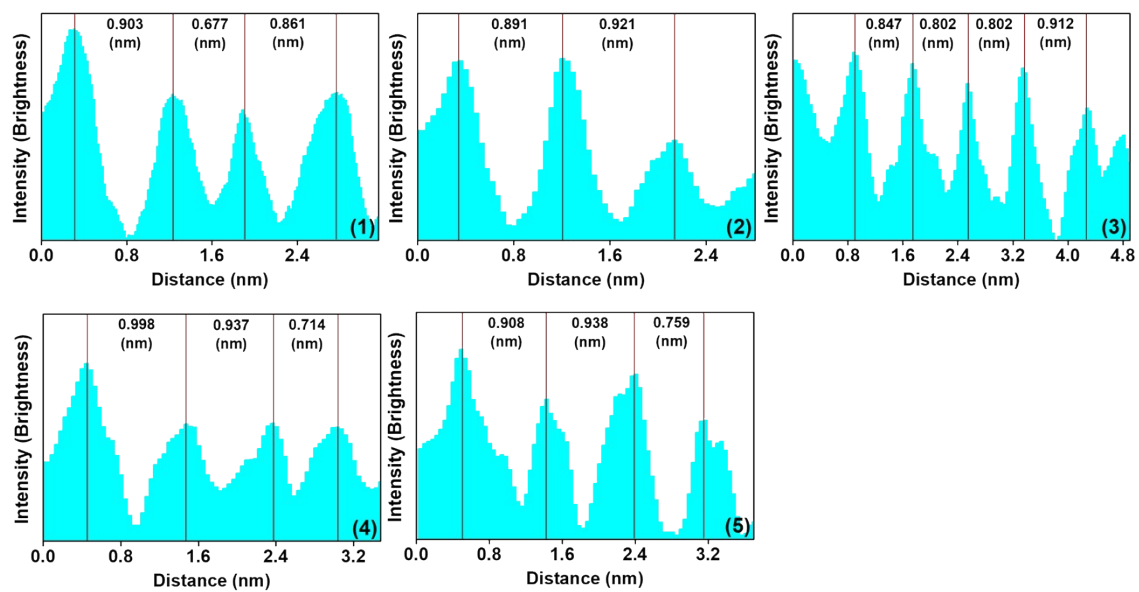

**Fig. S3** Brightness profile corresponding to Fig. 5

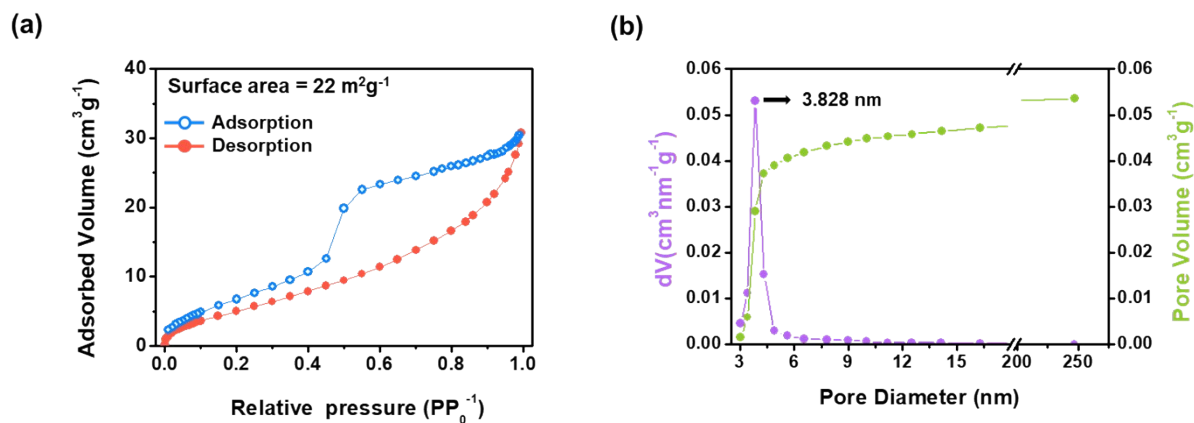

**Fig. S4** (a)  $N_2$  adsorption-desorption isotherms and (b) pore size distribution curve based on the Barrett-Joyner-Halenda (BJH) method for AR-150 .

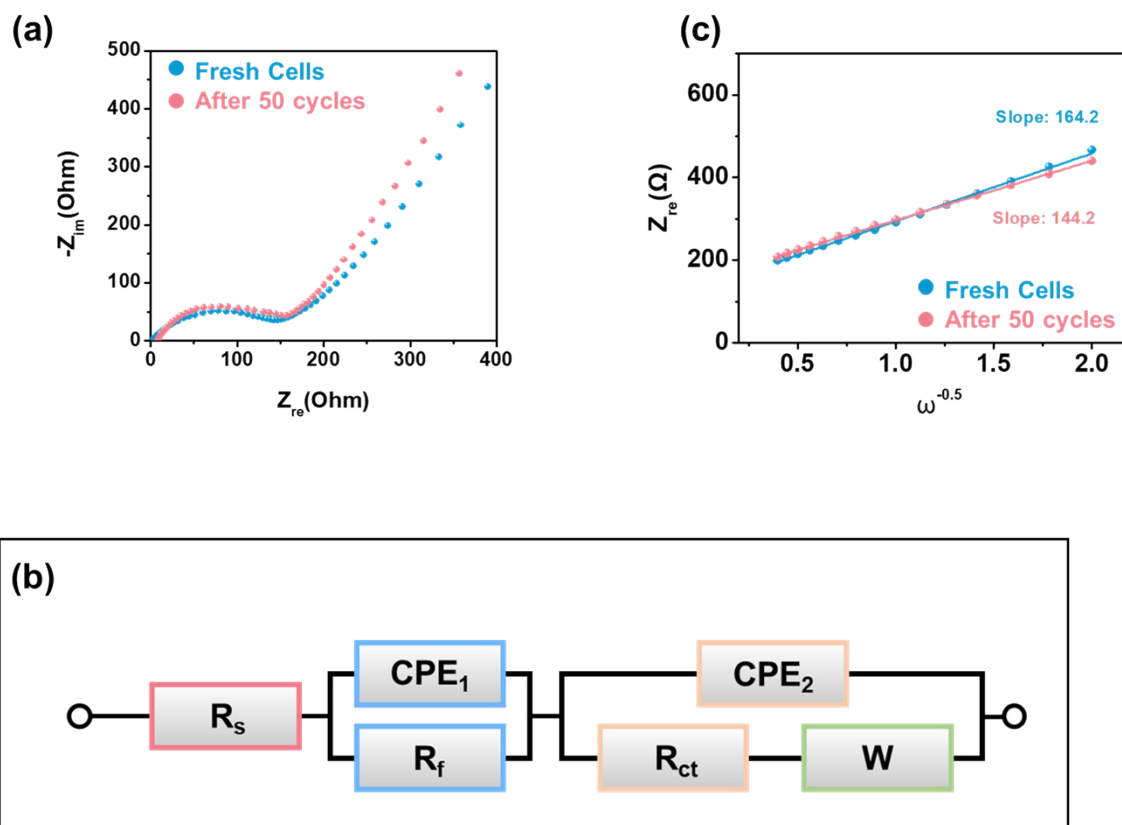

**Fig. S5** EIS analysis of AR-150 anode; (a) Nyquist plots for a fresh cell and after 50 cycles; (b) The equivalent circuit model for the EIS data fitting; (c) Warburg plots for a fresh cell and after 50 cycles.

**Table S1.** Comparison of lithium storage performance of RuO<sub>2</sub>-based anodes reported in previous literature; a (mA h g<sup>-1</sup>); b (mA g<sup>-1</sup>).

| Anode materials                                         | Capacity<br>(Capacity <sup>a</sup> /Current<br>density <sup>b</sup> /Cycle number) | Voltage range<br>(vs. Li/Li <sup>+</sup> ) | Ref.             |
|---------------------------------------------------------|------------------------------------------------------------------------------------|--------------------------------------------|------------------|
| <b>AR-150</b>                                           | <b>418.2/50/80</b><br><b>379.0/100/120</b>                                         | <b>0.05–2.5</b>                            | <b>This work</b> |
| RuO <sub>2</sub> hollow<br>sphere                       | 600/50/30                                                                          | 0.05–2.5                                   | 1                |
| Ge/RuO <sub>2</sub><br>nanocomposite                    | 471/90/100                                                                         | 0.01–2.0                                   | 2                |
| Hierarchical<br>columnar RuO <sub>2</sub><br>nanoplates | ~754.9/806/60                                                                      | 0.1–4.0                                    | 3                |
| NiRu–C–NF-2                                             | 350/72/40                                                                          | 0.005–3.0                                  | 4                |

**Table S2.** Impedance parameter values for the AR-150 electrode fitted through the equivalent circuit model in Fig S5b.

|                                | AR-150             |                    |                       |
|--------------------------------|--------------------|--------------------|-----------------------|
|                                | $R_s$ ( $\Omega$ ) | $R_f$ ( $\Omega$ ) | $R_{ct}$ ( $\Omega$ ) |
| <b>Fresh cell</b>              | 2.7                | 1.9                | 97.1                  |
| <b>50<sup>th</sup> cycling</b> | 7.7                | 10.2               | 87.6                  |

## References

1. W.-J. Lee, Y.-G. Chun, S.-J. Jang, S.-M. Paek and J.-M. Oh, *J. Alloys Compd.*, 2017, **711**, 611–616.
2. J.-H. Jang, M. Lee, J.-H. Koo and S.-M. Paek, *Int. J. Mol. Sci.*, 2022, **23**, 11766.
3. A. Navulla, G. Stevens, I. Kovalenko and L. Meda, *J. Phys. Chem. C Nanomater. Interfaces*, 2014, **118**, 13382–13386.
4. Y. Wu, R. Balakrishna, M. V. Reddy, A. S. Nair, B. V. R. Chowdari and S. Ramakrishna, *J. Alloys Compd.*, 2012, **517**, 69–74.
